# Supplementary material for: Sensitivity to targeted therapy differs between HER2-amplified breast cancer cells harboring kinase and helical domain mutations in PIK3CA
Source: Breast Cancer Res. 2021 Aug 3;23:81. doi: 10.1186/s13058-021-01457-0 (PMC8336338; doi:10.1186/s13058-021-01457-0)
Supplement: Supplementary file 2 — Additional file 2: Supplemental Table 1. List of primers used in this study. Supplemental Table 2. List of antibodies used in this study. [file 13058_2021_1457_MOESM2_ESM.xlsx]

## Sheet: Supplementary Table 1
Experiment	Primer Name	Sequence (5'-->3")	Notes
RT-PCR	PTEN RT-PCR F1	CCATTTCCATCCTGCAGAAGA
	PTEN RT-PCR R1	GGATATTGTGCAACTCTGCAATTAA
	TBP-F	CACGAACCACGGCACTGATT
	TBP-R	TTTTCTTGCTGCCAGTCTGGAC
On-target CRISPR primers	PTEN ex4 F	AATATGGGGGTGATAACAG
	PTEN ex4 R	GCTGCACTTTAGTCTTCCTG
	PTEN ex4 seq	CACATTATAAAGATTCAGGC	nested primer for sequencing
Off-target CRISPR primers	DENND2C F	CAGCAATGTAGAATCGCTT
	DENND2C R	CTTATGGGTTCAACAGAGC
	DENND2C seq	TACACCAAACGTTTCCATGC	nested primer for sequencing
	MCPH1 F	ACCCTTAGCTTTATGAGTACC
	MCPH1 R	GCTTGTCTCTTGGCACCT
	MCPH1 seq	TGACTTTTGTATTTGCAGTTG	nested primer for sequencing
	PTENP1 F	GGATTCGACTTAGACTTGACC
	PTENP1 R	TAATACACATAGCGCCTCTG
	PTENP1 seq	GACTTGAAGGCGTATACAGG	nested primer for sequencing
Genomic DNA amplification	PIK3CA9-5F1	ATCTCTTTCCTGGACTACTGG
	pSEPT-R	GCAGACAGCGAATTAATTCC
	PIK3CA9-5F2	TGTTCGCAAATTTTACGTGG	nested primer for sequencing
	pSEPT-F	TTAAGGTACCACTGTGCATATG
	PIK3CA20-3R2	AGAGAATGGAAGACGGGAG
	PIK3CA20-3R1	TAAATGGGATAGTGCCTGAG	nested primer for sequencing
cDNA amplification	PIK3CA ex9 cDNA F	CGACTTTGCCTTTCCATTTG
	PIK3CA ex9 cDNA R	GGGTAATTACAGTCCAGAAG
	PIK3CA ex9 cDNA seq	CAGGATTTAGCTATTCCCAC	nested primer for sequencing
	PIK3CAex20 F	TAACATCATGGTGAAAGACG
	PIK3CAex20 R	TCAGTTCAATGCATGCTGT
	PIK3CAex20 SEQ F	TGTTACAAGGCTTATCTAGC	nested primer for sequencing

## Sheet: Supplementary Table 2
Antibody	Manufacturer	western dilution	Species	Size (kDa)
4E-BP-1, phospho-Thr37/Thr46	Cell Signaling, 2855	1:2000	Rabbit IgG	15-20
4E-BP-1, total	Cell Signaling, 9452	1:1000	Rabbit	15-20
beta-actin	Santa Cruz, sc-47778	1:4000	Mouse	42
Akt, phospho-Thr308	Cell Signaling, 2965	1:1000	Rabbit IgG	60
Akt, phospho-Ser473	Cell Signaling, 4060	1:10,000	Rabbit	60
Akt, phospho-Ser473	Cell Signaling, 9271	1:1000	Rabbit	60
Akt, total	Cell Signaling, 2920	1:4000	Mouse	60
beta-tubulin	Santa Cruz, sc-55529	1:20,000	Mouse	55
EGFR, phospho (Tyr1173)	Cell Signaling, 4407S	1:1000	Rabbit, IgG	175
EGFR, phospho (Tyr1068)	Cell Signaling, 2236	1:1000	Mouse IgG1	175
EGFR, total	Cell Signaling, 2232	1:1000	Rabbit	175
Erk1/2, phospho-Thr202/Tyr204	Cell Signaling, 9101	1:1000	Rabbit	42/44
Erk1/2, phospho-Thr202/Tyr204	Cell Signaling, 4370	1:2000	Rabbit IgG	42/44
Erk1/2, total	Cell Signaling, 9102	1:4000	Rabbit	42/44
GAPDH	Cell Signaling, 2118	1:20,000	Rabbit	36
HER2, phospho-Tyr1248	Upstate, 06-229	1:5000	Rabbit	185
HER2, total	Oncogene, #OP14	1:1000	Mouse	185
HER3, phospho-Tyr1289	Cell Signaling, 4791	1:1000	Rabbit	185
HER3, total	Cell Signaling, 4754	1:1000	Rabbit, IgG	185
p90RSK, phospho-Thr359/Ser363	Cell Signaling, 9344	1:1000	Rabbit	90
p90RSK, total (RSK1/RSK2/RSK3)	Cell Signaling, 9355	1:1000	Rabbit, IgG	90
PDK1, phospho-Ser241	Cell Signaling, 3438	1:1000	Rabbit, IgG	58 to 68
PDK1, total	BD Bioscience, 611070	1:1000	Mouse, IgG1	58 to 63
PRAS40, phospho-Thr246	Cell Signaling, 2997	1:2000	Rabbit, IgG	40
PRAS40, total	Cell Signaling, 2691	1:4000	Rabbit, IgG	40
PTEN	Cell Signaling, 9552	1:1000	Rabbit	54
PTEN	Cell Signaling, 9556	1:1000	Mouse, IgG2b	54
PTEN	Cell Signaling, 9188	1:1000	Rabbit, IgG	54
S6 Ribosomal protein, phospho-Ser235/236	Cell Signaling, 2211	1:2000	Rabbit	32
S6 Ribosomal protein, phospho-Ser240/244	Cell Signaling, 2215	1:2000	Rabbit	32
S6 Ribosomal protein, total	Cell Signaling, 2317	1:5000	Mouse	32
S6K, phospho-T389	Cell Signaling, 9205	1:1000	Rabbit	70, 85
S6K, phospho-T389	Cell Signaling, 9206	1:1000	Mouse	70, 85
S6K, phospho-T389	Cell Signaling, 9234	1:1000	Rabbit, IgG	70, 85
S6K, total	Transduction Labs, 611260	1:1000	Mouse	70
